# Supplementary material for: The Impact of COVID-19 Pandemic on the Clinical Practice Patterns in Atrial Fibrillation: A Multicenter Clinician Survey in China
Source: MDPI journal article supplement (doi:10.3390/jcm11216469), 2022-10-31
Supplement: s1 [file s1]

**Table S1.** Locations of participated cardiologists (n= 213)

| Provinces | n (%)       |
|-----------|-------------|
| Anhui     | 9 (4.2)     |
| Beijing   | 17 (8.0)    |
| Chongqing | 5 (2.3)     |
| Fujian    | 10 (4.7)    |
| Gansu     | 8 (3.8)     |
| Guangdong | 10 (4.7)    |
| Guangxi   | 5 (2.3)     |
| Guizhou   | 4 (1.9)     |
| Hainan    | 8 (3.8)     |
| Hebei     | 6 (2.8)     |
| Henan     | 12 (5.6)    |
| Hunan     | 6 (2.8)     |
| Jiangsu   | 15 (7.0)    |
| Jilin     | 5 (2.3)     |
| Liaoning  | 7 (3.3)     |
| Shangdong | 14 (6.6)    |
| Shanghai  | 27 (12.7)   |
| Shanxi    | 8 (3.8)     |
| Sichuan   | 7 (3.3)     |
| Xinjiang  | 11 (5.2)    |
| Yunnan    | 9 (4.2)     |
| Zhejiang  | 10 (4.7)    |
| Total     | 213 (100.0) |
